# Supplementary material
Source: MDPI journal article supplement (https://www.mdpi.com/2673-9992/8/1/9)

# Measuring Temporal Patterns of the Nest-building Process in Mice for Animal Welfare and Disease

Lydia Giménez-Llort 1,2, Ana Ruiz de Molina García 1,2

1. Institut de Neurociències, Universitat Autònoma de Barcelona, Spain; 2. Dept Psychiatry and Forensic Medicine, Universitat Autònoma de Barcelona, Spain

## INTRODUCTION

- Nesting behavior in rodents is a species-typical ethological behavior used as a naturalistic instrument for measuring animal welfare/illness and behavioral aspects related to instrumental tasks [1-3]
- It is also proposed as valuable for disease monitoring, evaluating potential risk factors and preventive/therapeutical interventions [4-6]
- The reliability of Deacon's scale to score nests at 24 h is well-recognized, and it is based on a 5-point ordinal scale ranging from 'not noticeably touched nesting material' to 'perfect nest' [7]
- In previous work using an animal model of Alzheimer's disease and wild-type counterparts, we proposed a 3-day protocol to discard false negatives, thus unveiling genotype-, sex- and age-dependent differences [4]

- REFERENCES:**
  - Jirkof, P. Burrowing and nest building behavior as indicators of well-being in mice. *J. Neurosci. Methods* **2014**, *234*, 139–146.
  - Olsson, I.A.; Dahlborn, K. Improving housing conditions for laboratory mice: A review of "environmental enrichment".
  - Gaskill, B.; Pritchett-Corning, K.R. Nest building as an indicator of illness in laboratory mice. *J. Appl. Anim. Behav. Sci.* **2016**, *180*, 140–146.
  - Torres-Lista, V.; Giménez-Llort, L. Impairment of nesting behaviour in 3xTg-AD mice. *Behav. Brain Res.* **2013**, *247*, 153–157.
  - Van der Leugd, A.; Parra-Damas, A.; Baeta-Corral, R.; Soto-Faguás, C.M.; Ahmed, T.; LaFerla, F.M.; Giménez-Llort, L.; D'Hooge, R.; Saura, C. Reversal of memory and neuropsychiatric symptoms and reduced tau pathology by selenium in 3xTg-AD mice. *Sci. Rep.* **2018**, *8*, 6431.
  - Muntsant, A.; Giménez-Llort, L. Impact of social isolation on the behavioral and functional profiles and hippocampal atrophy
  - asymmetry in dementia in times of coronavirus pandemic (COVID-19): A translational neuroscience approach. *Front. Psychiatry* **2020**, *11*, 572583.
  - Deacon, R.M.J. Assessing nest building in mice. *Nat. Protoc.* **2006**, *1*, 1117–1119.
  - Oddo, S.; Caccamo, A.; Shepherd, J.D.; Murphy, M.P.; Golde, T.E.; Kaye, R.; Metherate, R.; Mattson, M.P.; Akbari, Y.; LaFerla, F.M. Triple transgenic model of Alzheimer's disease with plaques and tangles: Intracellular A and synaptic dysfunction. *Neuron* **2003**, *39*, 409–421.

## AIMS

Now, we propose **the size of nesting** as a numeric variable complementary to the ordinal scale. This would allow the required parametric repeated measures analysis to identify and evaluate temporal patterns in the nest-building process.

## METHODS

For this purpose, individual nests of twenty-three male and female mice with normal (C57BL/6) and AD-pathological aging (3xTg-AD mice, [8]) (n=7-8/group) were studied using paper nesting material and our 3-days protocol [4]. Measures were performed with Deacon's scale [7] and the new numeric variable 'nest size', as analyzed with free software Kinovea 5.0 and determination of N1 (size of the nest at 24h), N2 (size of the nest at 48h), and N3 (size of the nest at 72h). The protocol CEEAH 3588/DMAH9452 was approved the 8th of March 2019 by Department de Medi Ambient i Habitatge, Generalitat de Catalunya. Results are expressed as mean ± SEM. SPSS 15.0. The size of nests was analyzed with RM repeated-measures ANOVA with genotype and sex as between factors, day as within factor. One-way analysis of variance (ANOVA) followed by Bonferroni's post-hoc test and a paired t-test were also used. Statistical significance: p<0.05.

**3-days nesting protocol** ([4]Torres-Lista & Giménez-Llort, 2013)

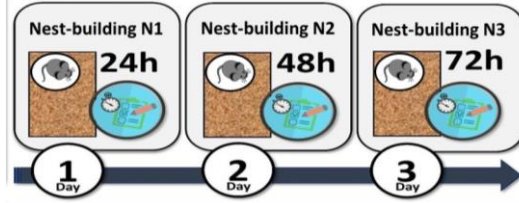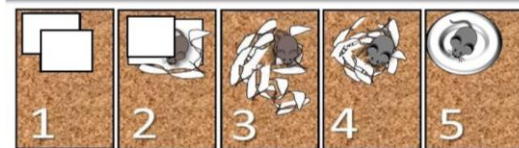

**Deacon's nesting score (1-5)**

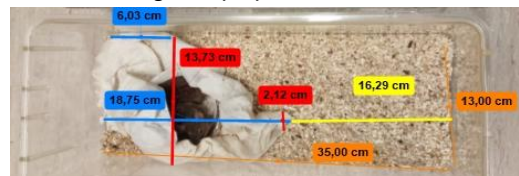

Nest size: A new, parametric, nesting score

## RESULTS

**1.** The nest-building process responded to a linear equation in wild-type animals

(Only NTg - RM ANOVA N1N2N3 - Day  
Lineal  $F(1,14)=9.941$ ,  $p=.007$ , \*\*\*  
Quadratic,  $F(1,14)=.529$ ,  $p=.476$ , n.s.) OR  
when female sex was considered  
(Only Females - RM ANOVA N1N2N3 - Day  
Lineal  $F(1,13)=7.341$ ,  $p=.018$ , \*\*  
Quadratic,  $F(1,13)=.025$ ,  $p=.877$ , n.s.)

**2.** However, the lineal progression was found disrupted in males

(Only Males - RM ANOVA N1N2N3- Day  
Lineal  $F(1,16)=.593$ ,  $p=.453$ , n.s.; Quadratic,  
 $F(1,16)=.356$ ,  $p=.467$ , n.s.)  
or the AD-genotype  
(Only 3xTg-AD - RM ANOVA N1N2N3-Day  
Lineal  $F(1,15)=.117$ ,  $p=.737$ , n.s.; Quadratic,  
 $F(1,15)=.354$ ,  $p=.478$ , n.s.)

**3.** Genotype per sex interaction indicated that the nest-building process was optimal in wild-type females, as they build the best nests at 72h, while the worst nest was that of 3xTg-AD females at 48h  
(N2,  $F(1,29)=5.311$ ,  $p=.029$ , \*\*)

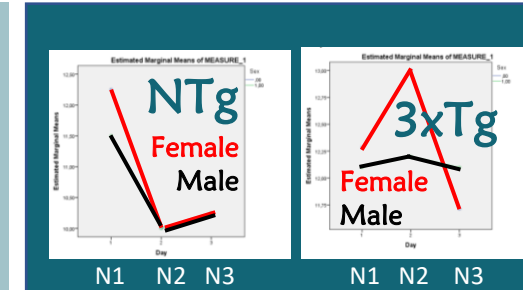

Fig 1. Time course representation of the nest size (cm) in the 3-day nest protocol [4]. Nesting on day 1 (N1), day 2 (N2) and day 3 (N3).

**1. Sample: NTg mice / Sex effect**

| Source     | Day       | Type III Sum of Squares | df | Mean Square | F     | Sig. | Partial Eta Squared | Noncent. Parameter | Observed Power <sup>a</sup> |
|------------|-----------|-------------------------|----|-------------|-------|------|---------------------|--------------------|-----------------------------|
| Day        | Linear    | 21.125                  | 1  | 21.125      | 9.941 | .007 | .415                | 9.941              | .834                        |
|            | Quadratic | 12.042                  | 1  | 12.042      | 4.407 | .054 | .239                | 4.407              | .498                        |
| Day* Sex   | Linear    | 1.125                   | 1  | 1.125       | .529  | .479 | .036                | .529               | .104                        |
|            | Quadratic | .375                    | 1  | .375        | .137  | .717 | .010                | .137               | .064                        |
| Error(Day) | Linear    | 29.750                  | 14 | 2.125       |       |      |                     |                    |                             |
|            | Quadratic | 38.250                  | 14 | 2.732       |       |      |                     |                    |                             |

a. Computed using alpha = .05

**2. Sample: Females / Genotype effect**

| Source        | Day       | Type III Sum of Squares | df | Mean Square | F     | Sig. | Partial Eta Squared | Noncent. Parameter | Observed Power <sup>a</sup> |
|---------------|-----------|-------------------------|----|-------------|-------|------|---------------------|--------------------|-----------------------------|
| Day           | Linear    | 12.343                  | 1  | 12.343      | 7.341 | .018 | .361                | 7.341              | .707                        |
|               | Quadratic | .156                    | 1  | .156        | .025  | .877 | .002                | .025               | .052                        |
| Day* Genotype | Linear    | 3.810                   | 1  | 3.810       | 2.266 | .156 | .148                | 2.266              | .286                        |
|               | Quadratic | 12.600                  | 1  | 12.600      | 2.014 | .179 | .134                | 2.014              | .260                        |
| Error(Day)    | Linear    | 21.857                  | 13 | 1.681       |       |      |                     |                    |                             |
|               | Quadratic | 81.333                  | 13 | 6.256       |       |      |                     |                    |                             |

a. Computed using alpha = .05

**3. Sample: All / Genotype x Sex / Nest 48h**

| Source          | Type III Sum of Squares | df | Mean Square | F       | Sig. | Partial Eta Squared | Noncent. Parameter | Observed Power <sup>a</sup> |
|-----------------|-------------------------|----|-------------|---------|------|---------------------|--------------------|-----------------------------|
| Corrected Model | 55.370 <sup>a</sup>     | 3  | 18.457      | 1.787   | .172 | .156                | 5.360              | .416                        |
| Intercept       | 4145.299                | 1  | 4145.299    | 401.247 | .000 | .933                | 401.247            | 1.000                       |
| Genotype        | 54.864                  | 1  | 54.864      | 5.311   | .029 | .155                | 5.311              | .606                        |
| Sex             | 1.299                   | 1  | 1.299       | .126    | .726 | .004                | .126               | .064                        |
| Genotype * Sex  | 1.299                   | 1  | 1.299       | .126    | .726 | .004                | .126               | .064                        |
| Error           | 299.600                 | 29 | 10.331      |         |      |                     |                    |                             |
| Total           | 4571.000                | 33 |             |         |      |                     |                    |                             |
| Corrected Total | 254.970                 | 32 |             |         |      |                     |                    |                             |

a. R Squared = .156 (Adjusted R Squared = .069)

b. Computed using alpha = .05

**Paired Samples Correlations**

Sample: NTg Males Females / n.s.

| Pair           | N  | Correlation | Sig. |
|----------------|----|-------------|------|
| Pair 1 N2 & N1 | 16 | .312        | .240 |
| Pair 2 N3 & N2 | 16 | .311        | .241 |
| Pair 3 N3 & N1 | 16 | .417        | .108 |

Sample: 3xTg-AD Males Females / 24-48-72h

| Pair           | N  | Correlation | Sig. |
|----------------|----|-------------|------|
| Pair 1 N2 & N1 | 17 | .691        | .002 |
| Pair 2 N3 & N2 | 17 | .554        | .021 |
| Pair 3 N3 & N1 | 17 | .699        | .002 |

Sample: Males NTg 3xTg-AD / 24-48-72h

| Pair           | N  | Correlation | Sig. |
|----------------|----|-------------|------|
| Pair 1 N2 & N1 | 18 | .749        | .000 |
| Pair 2 N3 & N2 | 18 | .693        | .001 |
| Pair 3 N3 & N1 | 18 | .653        | .003 |

Sample: Females NTg 3xTg-AD / 72h vs. 24h

| Pair           | N  | Correlation | Sig. |
|----------------|----|-------------|------|
| Pair 1 N2 & N1 | 15 | .396        | .144 |
| Pair 2 N3 & N2 | 15 | .426        | .113 |
| Pair 3 N3 & N1 | 15 | .546        | .035 |

## CONCLUSIONS

On each day, data were consistent with the ordinal scale, but the identification of temporal patterns with the numeric variable confirmed nest-building as a complex process, which is sensitive to sex and genotype.

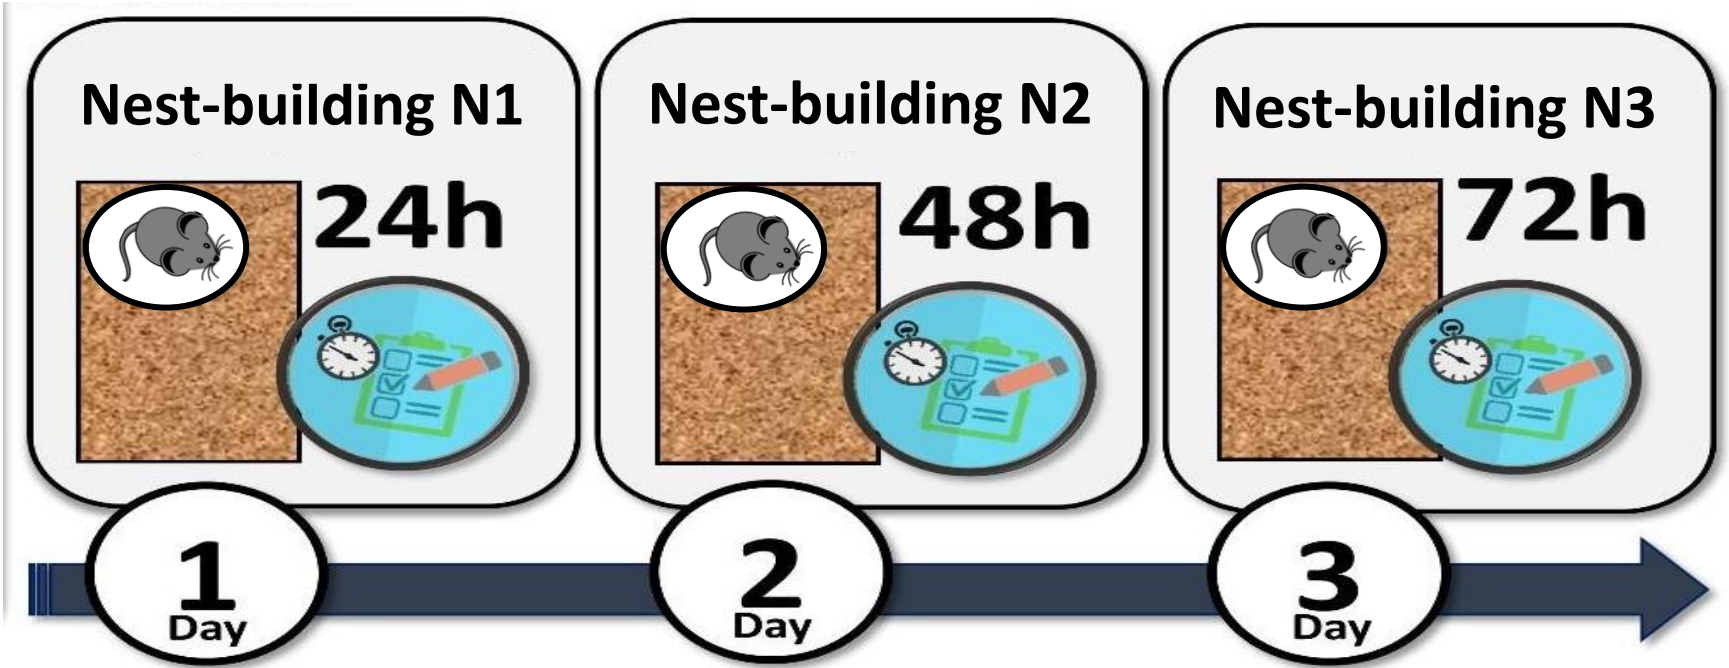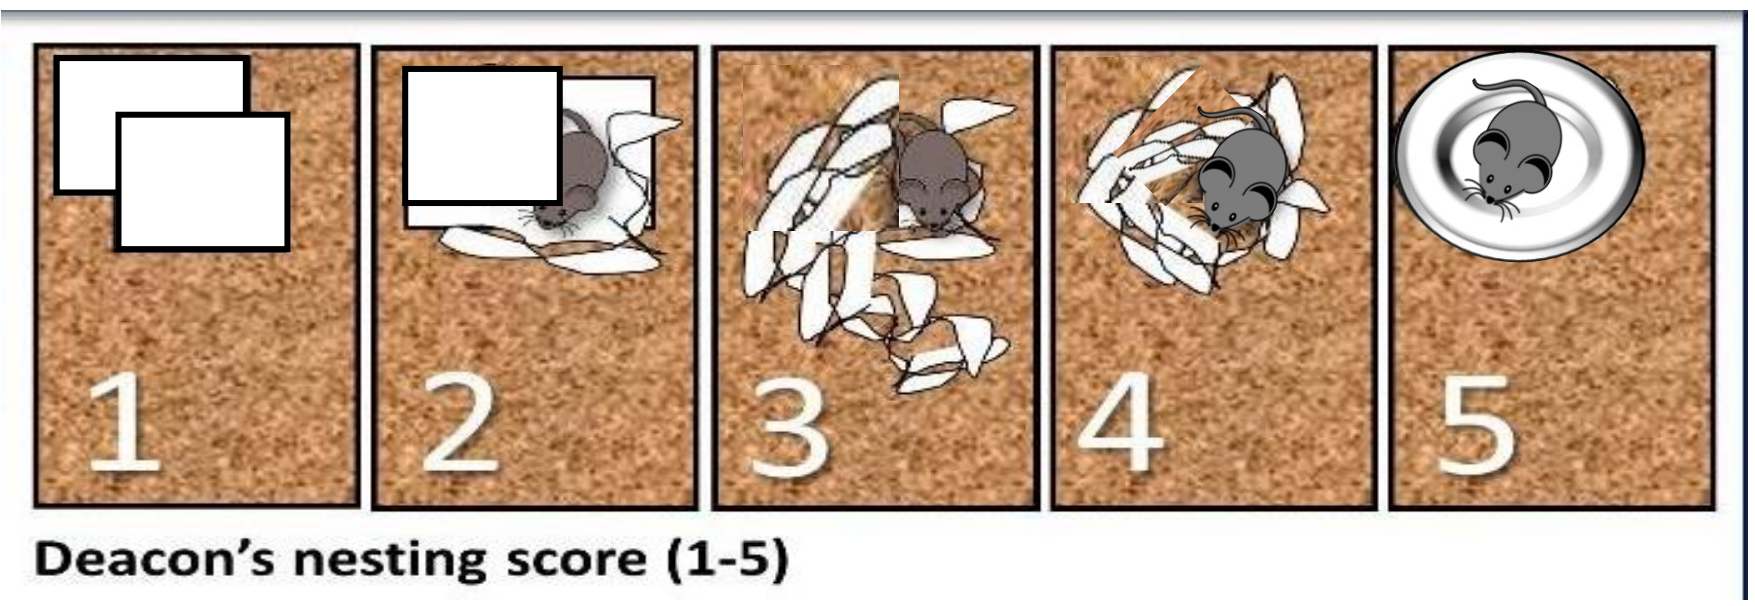

Supplement: s1 [file s1]
